# Supplementary material for: Reliability of continuous cardiac output measurement during intra-abdominal hypertension relies on repeated calibrations: an experimental animal study
Source: PubMed Central journal article supplement (PMC2592771; doi:10.1186/cc7102), 2008-10-29
Supplement: cc7102-S1.pdf [file cc7102-S1.pdf]

## Additional data file

Table S1: Bland-Altman Analysis comparing CO<sub>TCP</sub> and different CO methods

| CO <sub>TCP</sub> <sup>-</sup> | CO <sub>average</sub><br>(l·min <sup>-1</sup> ) | bias ± SD<br>(l·min <sup>-1</sup> ) | 95% LoA<br>(l·min <sup>-1</sup> ) | PE<br>(%)         | r <sup>2</sup> |
|--------------------------------|-------------------------------------------------|-------------------------------------|-----------------------------------|-------------------|----------------|
| <b>all (pooled data)</b>       |                                                 |                                     |                                   |                   |                |
| PulseCO                        | 7.3 ± 2.1                                       | 1.0 ± 1.5                           | -2.1 – 3.9                        | 41.7 <sup>#</sup> | 0.63           |
| PCCO <sub>pre</sub>            | 7.8 ± 1.9                                       | 1.0 ± 1.1                           | -1.1 – 3.1                        | 27.5              | 0.78           |
| PCCO <sub>recal</sub>          | 7.8 ± 2.3                                       | 0.0 ± 0.3                           | -0.7 – 0.6                        | 8.7               | 0.98           |
| CCO <sub>PAC</sub>             | 7.7 ± 2.0                                       | 0.0 ± 0.9                           | -1.7 – 1.8                        | 23.3              | 0.85           |
| <b>Baseline</b>                |                                                 |                                     |                                   |                   |                |
| PulseCO                        | 6.3 ± 1.7                                       | -0.2 ± 0.8                          | -1.8 – 1.5                        | 25.4              | 0.85           |
| PCCO <sub>pre</sub>            | n.a.                                            | n.a.                                | n.a.                              | n.a.              | n.a.           |
| PCCO <sub>recal</sub>          | 6.2 ± 1.6                                       | 0.0 ± 0.3                           | -0.5 – 0.6                        | 9.7               | 0.90           |
| CCO <sub>PAC</sub>             | 6.3 ± 1.4                                       | -0.2 ± 0.6                          | -1.5 – 1.0                        | 19.9              | 0.83           |
| <b>+ Fluid</b>                 |                                                 |                                     |                                   |                   |                |
| PulseCO                        | 7.3 ± 2.2                                       | 0.3 ± 1.6                           | -2.8 – 3.4                        | 43.8 <sup>#</sup> | 0.65           |
| PCCO <sub>pre</sub>            | 7.3 ± 1.5                                       | 0.3 ± 1.2                           | -2.1 – 2.7                        | 33.7 <sup>#</sup> | 0.73           |
| PCCO <sub>recal</sub>          | 7.5 ± 2.0                                       | 0.0 ± 0.5                           | -0.9 – 0.9                        | 12.5              | 0.95           |
| CCO <sub>PAC</sub>             | 7.5 ± 1.6                                       | -0.1 ± 1.1                          | -2.2 – 2.0                        | 28.6              | 0.71           |
| <b>IAH</b>                     |                                                 |                                     |                                   |                   |                |
| PulseCO                        | 7.4 ± 2.1                                       | 1.1 ± 1.4                           | -1.6 – 3.8                        | 38.8 <sup>#</sup> | 0.73           |
| PCCO <sub>pre</sub>            | 7.4 ± 1.8                                       | 1.1 ± 0.9 <sup>*</sup>              | -0.7 – 2.8                        | 24.1              | 0.80           |
| PCCO <sub>recal</sub>          | 8.0 ± 1.8                                       | 0.0 ± 0.1                           | -0.3 – 0.2                        | 3.5               | 0.99           |
| CCO <sub>PAC</sub>             | 7.8 ± 1.6                                       | 0.2 ± 0.9                           | -1.6 – 2.0                        | 23.5              | 0.75           |
| <b>IAH + Fluid</b>             |                                                 |                                     |                                   |                   |                |
| PulseCO                        | 8.2 ± 2.6                                       | 2.4 ± 0.8 <sup>*</sup>              | 0.7 – 4.0                         | 20.5              | 0.91           |
| PCCO <sub>pre</sub>            | 8.6 ± 2.2                                       | 1.5 ± 0.7 <sup>*</sup>              | 0.1 – 3.0                         | 17.2              | 0.97           |
| PCCO <sub>recal</sub>          | 9.4 ± 2.4                                       | 0.0 ± 0.4                           | -0.8 – 0.8                        | 8.9               | 0.97           |
| CCO <sub>PAC</sub>             | 9.3 ± 2.3                                       | 0.2 ± 1.0                           | -1.7 – 2.2                        | 21.1              | 0.86           |

\* p<0.05 vs. bias at previous experimental stage (PCCO<sub>pre</sub> vs. previous PCCO<sub>recal</sub>)

# not interchangeable according to Critchley et al.

presented are mean difference (bias) ± standard deviation (SD) together with limits of agreement (LoA), mean percentage error (PE) and coefficient of correlation (r<sup>2</sup>) comparing different methods and CO<sub>TCP</sub>, of all (pooled) data sets and data at different experimental steps.

PulseCO (pulse power analysis cardiac output, LiDCO system), PCCO (pulse contour cardiac output, PiCCO system), CCO<sub>PAC</sub> (continuous pulmonary artery catheter cardiac output), CO<sub>TCP</sub> (bolus trans-cardiopulmonary thermodilution cardiac output). PCCO was measured before (PCCO<sub>pre</sub>) and after (PCCO<sub>recal</sub>) recalibration by CO<sub>TCP</sub>

Figure S1: linear regression and Bland-Altman plots comparing changes ( $\Delta$ ) in CO

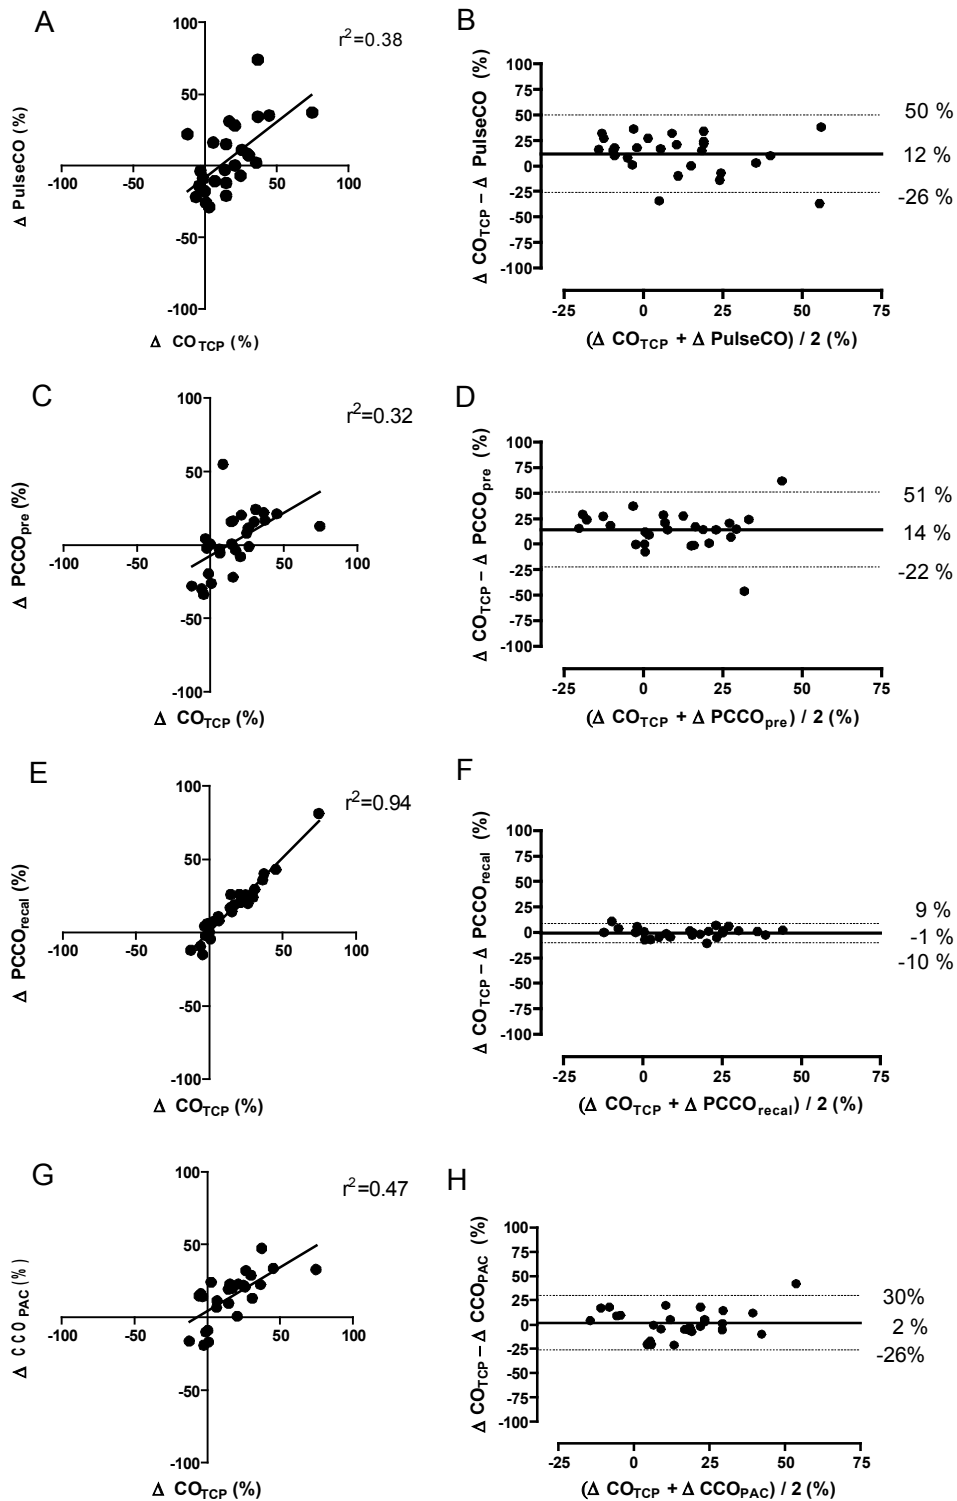

Figure S1: Linear regression (left) and Bland-Altman plots (right) comparing  
 A, B) PulseCO vs. CO<sub>TCP</sub>; C, D) PCCO<sub>pre</sub> vs. CO<sub>TCP</sub>; E, F) PCCO<sub>recal</sub> vs. CO<sub>TCP</sub>;  
 G, H) CCO<sub>PAC</sub> vs. CO<sub>TCP</sub>

left: regression line – solid line

right: bias - solid line ( $\pm$  2SD – dotted lines)

Figure S2: Individual time response of each CO parameter and each animal

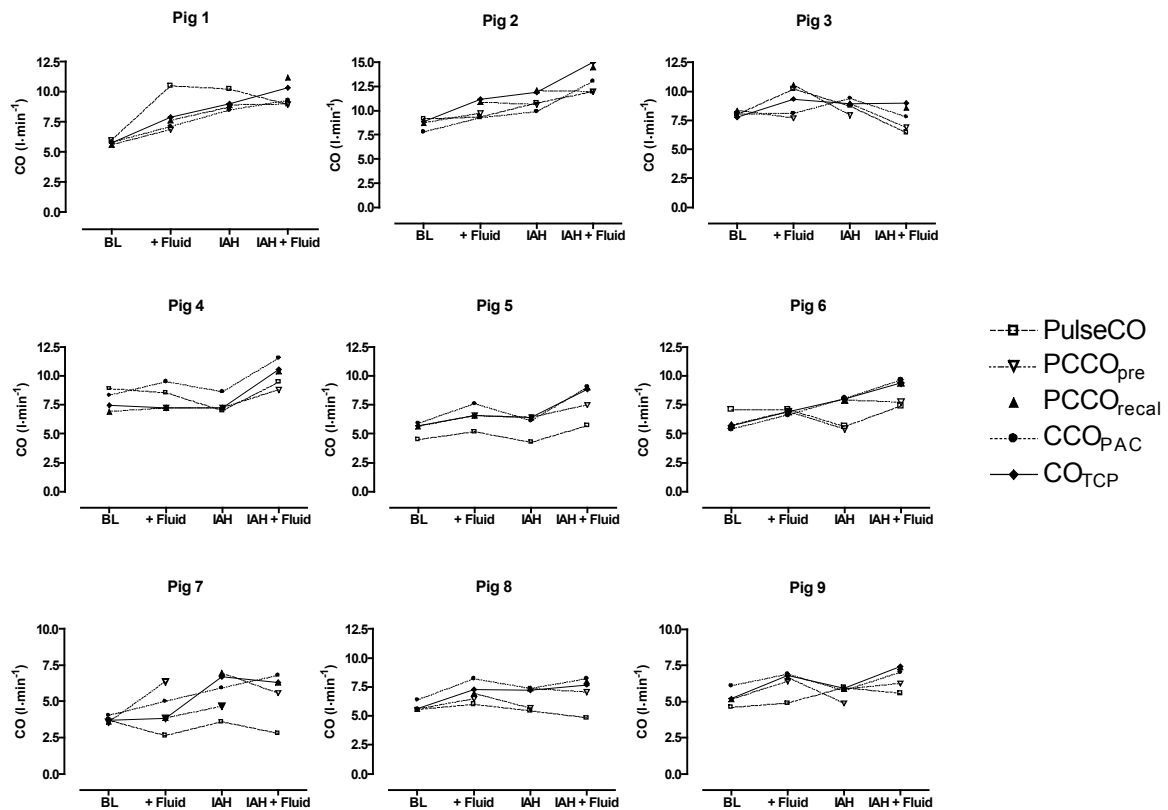

Figure S2: Individual time response of each CO parameter and each animal

Experimental steps: BL - baseline; + Fluid - fluid loading; IAH - intra-abdominal hypertension, IAH + Fluid - second fluid load at IAH

PulseCO (pulse power analysis cardiac output, LiDCO system), PCCO (pulse contour cardiac output, PiCCO system), CCO<sub>PAC</sub> (continuous pulmonary artery catheter cardiac output), CO<sub>TCP</sub> (bolus trans-cardiopulmonary thermodilution cardiac output). PCCO was measured before (PCCO<sub>pre</sub>) and after (PCCO<sub>recal</sub>) recalibration by CO<sub>TCP</sub>.
